# Supplementary material for: Leaf Apoplast of Field-Grown Potato Analyzed by Quantitative Proteomics and Activity-Based Protein Profiling
Source: Int J Mol Sci. 2021 Nov 6;22(21):12033. doi: 10.3390/ijms222112033 (PMC8584485; doi:10.3390/ijms222112033)
Supplement: Supplementary file 1 [file ijms-22-12033-s001.zip › Supplementary Table S1.xlsx]

## Sheet: Supplementary Table S1
Signal 1	Signal 2	Signal 2	Signal 3	Signal 3	Signal 3	Signal 4	Signal 4	Signal 4	Signal 4	T: Protein IDs	T: Majority protein IDs	PGSC	T: Fasta headers
4	3	3	2	3	3	3	2	3	2	M0ZNZ5;DES|comp22226_c0_seq1	M0ZNZ5;DES|comp22226_c0_seq1	PGSC0003DMP400003396	Non-specific lipid-transfer protein;
2	6	1	1	1	6	2	3	6	2	M1AU24;DES|comp37547_c0_seq1	M1AU24;DES|comp37547_c0_seq1	PGSC0003DMP400020595	Germin
0	0	0	0	0	2	0	0	0	0	DES|comp38754_c0_seq1;K7WNY2;DUL|comp17359_c0_seq1;DES|comp78224_c0_seq1;M1CKC5;M0ZYA4	DES|comp38754_c0_seq1;K7WNY2;DUL|comp17359_c0_seq1;DES|comp78224_c0_seq1;M1CKC5;M0ZYA4	PGSC0003DMP400026753	Glyceraldehyde-3-phosphate dehydrogenase
0	0	0	0	0	0	1	1	0	0	DES|comp57639_c0_seq1	DES|comp57639_c0_seq1	PGSC0003DMP400009268	Zinc finger protein
0	0	0	0	0	0	0	0	0	0	DES|comp58232_c0_seq1;M0ZMH1	DES|comp58232_c0_seq1;M0ZMH1	PGSC0003DMP400002766	Chitinase 134
0	1	0	0	0	1	4	12	8	1	M1CSC7;DES|comp59132_c0_seq1	M1CSC7;DES|comp59132_c0_seq1	PGSC0003DMP400049824	Alpha-L-fucosidase 2
1	2	0	0	0	1	0	1	1	0	DES|comp60225_c0_seq1;M0ZT17;DUL|comp6826_c0_seq1	DES|comp60225_c0_seq1;M0ZT17;DUL|comp6826_c0_seq1	PGSC0003DMP400005194	Proline-rich protein
0	0	0	0	1	0	0	0	0	0	DUL|comp7361_c0_seq1;M1CR89;P93787;M1AZD2;M1A7M4;DUL|comp9503_c0_seq1;DES|comp84033_c0_seq1;Q43643;M1BI71;Q6R2P7;DUL|comp21550_c0_seq2;P93784;M1BQ77;M1BC18;DUL|comp17501_c0_seq1;DES|comp85459_c0_seq2;Q41418;P93786;DUL|comp21774_c0_seq2;DES|comp61495_c0_seq1;M1C8L3;M1BQ79;DES|comp82671_c0_seq1;M1BTP6;DES|comp88507_c0_seq2;DUL|comp21625_c0_seq5;DUL|comp8187_c0_seq1;DES|comp78785_c0_seq1;M1CR90;DUL|…	DUL|comp7361_c0_seq1;M1CR89;P93787;M1AZD2;M1A7M4;DUL|comp9503_c0_seq1;DES|comp84033_c0_seq1;Q43643;M1BI71;Q6R2P7;DUL|comp21550_c0_seq2;P93784;M1BQ77;M1BC18;DUL|comp17501_c0_seq1;DES|comp85459_c0_seq2;Q41418;P93786;DUL|comp21774_c0_seq2;DES|comp61495_c0_seq1;M1C8L3;M1BQ79;DES|comp82671_c0_seq1;M1BTP6;DES|comp88507_c0_seq2;DUL|comp21625_c0_seq5;DUL|comp8187_c0_seq1;DES|comp78785_c0_seq1;M1CR90;DUL|…	PGSC0003DMP400028189	14-3-3 protein
1	1	0	0	0	0	0	0	0	0	DUL|comp29430_c0_seq1;M1CXU2;DES|comp61660_c0_seq2	DUL|comp29430_c0_seq1;M1CXU2;DES|comp61660_c0_seq2	PGSC0003DMP400052213	Phospholipase A2
0	0	4	1	0	0	0	0	0	0	M1CB98;DUL|comp9667_c0_seq2;DES|comp66750_c0_seq2;M1CB97;M1CWY9	M1CB98;DUL|comp9667_c0_seq2;DES|comp66750_c0_seq2;M1CB97	PGSC0003DMP400042979	Carboxypeptidase
0	0	0	0	0	0	0	0	0	1	M1BPP7;DES|comp67402_c0_seq1	M1BPP7;DES|comp67402_c0_seq1	PGSC0003DMP400033771	Pathogen-and wound-inducible antifungal protein CBP20
0	2	2	0	0	0	0	0	0	0	M1BYH5;DES|comp67866_c0_seq1;M1BYH4;M1BYH6;DUL|comp12473_c0_seq2	M1BYH5;DES|comp67866_c0_seq1;M1BYH4;M1BYH6;DUL|comp12473_c0_seq2	PGSC0003DMP400037552	Polygalacturonase
2	3	1	1	1	4	1	1	3	1	M1AGK5;DES|comp69002_c0_seq1	M1AGK5;DES|comp69002_c0_seq1	PGSC0003DMP400015232	Endochitinase (Chitinase)
1	1	1	1	0	0	0	0	1	0	M1AVB4;M1AVB3;DES|comp69380_c0_seq1	M1AVB4;M1AVB3;DES|comp69380_c0_seq1	PGSC0003DMP400021164	Non-specific lipid-transfer protein
0	0	0	0	0	0	0	0	0	0	M1C3N2;M1C3N3;DUL|comp8011_c0_seq1;DES|comp71018_c0_seq1	M1C3N2;M1C3N3;DUL|comp8011_c0_seq1;DES|comp71018_c0_seq1	PGSC0003DMP400039754	Methylesterase
0	0	0	0	0	0	0	0	0	0	DES|comp72036_c0_seq2	DES|comp72036_c0_seq2	PGSC0003DMP400010541	Beta-D-glucan exohydrolase
0	1	0	0	0	0	2	0	0	0	DUL|comp17385_c0_seq2;Q43848;M1BZW7;DES|comp72099_c0_seq1;M1A9Z4	DUL|comp17385_c0_seq2;Q43848;M1BZW7;DES|comp72099_c0_seq1;M1A9Z4	PGSC0003DMP400038185	Transketolase, chloroplastic
0	0	0	0	0	0	0	0	0	0	M1AQZ8;M1CB14;DUL|comp24708_c0_seq1;DES|comp72260_c0_seq1	M1AQZ8;M1CB14;DUL|comp24708_c0_seq1;DES|comp72260_c0_seq1	PGSC0003DMP400042888	Xyloglucan endotransglucosylase/hydrolase
0	0	0	0	0	0	0	0	2	3	DES|comp75769_c0_seq1;M0ZGP0;M0ZGN9	DES|comp75769_c0_seq1;M0ZGP0	PGSC0003DMP400000303	Gibberellin receptor GID1
0	0	0	2	0	1	0	0	1	0	DES|comp75922_c0_seq2	DES|comp75922_c0_seq2	PGSC0003DMP400023518	Metal ion binding protein
3	3	4	3	3	4	1	4	5	1	M1AZT7;DES|comp77177_c0_seq1	M1AZT7;DES|comp77177_c0_seq1	PGSC0003DMP400023053	24K germin
2	4	2	1	1	3	1	4	3	1	DES|comp77597_c0_seq1;M1B3M1	DES|comp77597_c0_seq1;M1B3M1	PGSC0003DMP400024701	Germin
0	0	0	0	0	0	0	0	5	2	M1BS46;DES|comp77626_c1_seq1;M1CST1	M1BS46;DES|comp77626_c1_seq1	PGSC0003DMP400034826	Zinc finger protein
0	0	0	1	1	0	1	0	0	0	DES|comp77655_c0_seq1;Q5XUG9;M1B0L7;DUL|comp25551_c0_seq1;M0ZYP9	DES|comp77655_c0_seq1;Q5XUG9;M1B0L7;DUL|comp25551_c0_seq1;M0ZYP9	PGSC0003DMP400007581	Thaumatin
0	0	0	0	0	0	0	0	0	0	Q38HT8;DUL|comp15342_c0_seq1;DES|comp77667_c0_seq1	Q38HT8;DUL|comp15342_c0_seq1;DES|comp77667_c0_seq1	PGSC0003DMP400010984	Proteasome subunit alpha type
0	1	0	0	0	0	0	0	2	0	M1B588;DES|comp77739_c0_seq1	M1B588;DES|comp77739_c0_seq1	PGSC0003DMP400025379	Fasciclin-like arabinogalactan protein 10
0	0	0	0	0	0	0	0	0	0	DES|comp78395_c0_seq1;DUL|comp22959_c0_seq1;M0ZZ60	DES|comp78395_c0_seq1;DUL|comp22959_c0_seq1;M0ZZ60	PGSC0003DMP400007778	Esterase
1	0	0	0	0	0	1	0	0	0	DUL|comp24469_c0_seq1;M1CQK3;DUL|comp24112_c0_seq1;DES|comp78749_c0_seq1;M1BCP7	DUL|comp24469_c0_seq1;M1CQK3;DUL|comp24112_c0_seq1;DES|comp78749_c0_seq1;M1BCP7	PGSC0003DMP400049086	Thioredoxin peroxidase
1	0	0	0	0	0	0	0	0	1	M1A3E1;DES|comp78800_c0_seq1	M1A3E1;DES|comp78800_c0_seq1	PGSC0003DMP400009575	Uncharacterized protein;
0	0	0	0	0	0	0	2	0	0	M0ZL78;DES|comp79041_c0_seq1	M0ZL78;DES|comp79041_c0_seq1	PGSC0003DMP400002269	Leucine-rich repeat protein
0	0	0	1	0	0	3	1	0	1	M1D4F9;M1D4F8;DES|comp79258_c1_seq1;M1D4G1;M1AQA0;M1D4G0;M1D4F7;M1C3T8;DUL|comp23590_c1_seq1;DUL|comp22090_c0_seq2	M1D4F9;M1D4F8;DES|comp79258_c1_seq1;M1D4G1	PGSC0003DMP400054977	Phospholipase A1
0	1	0	0	0	0	0	0	0	0	DES|comp79560_c0_seq1	DES|comp79560_c0_seq1
0	0	0	0	0	0	0	0	1	1	M0ZU27;DES|comp80390_c0_seq2;M0ZU28;M0ZVM8;M0ZVM9;DUL|comp14889_c0_seq1;M1AVJ2;DUL|comp24053_c0_seq1	M0ZU27;DES|comp80390_c0_seq2;M0ZU28;M0ZVM8;M0ZVM9;DUL|comp14889_c0_seq1;M1AVJ2;DUL|comp24053_c0_seq1	PGSC0003DMP400005639	Fructose-bisphosphate aldolase
1	0	0	1	2	0	0	0	0	0	DES|comp80774_c0_seq1;DUL|comp7383_c0_seq1;M1CNK7;DES|comp69011_c0_seq1;DES|comp76812_c0_seq1;DES|comp76377_c0_seq1;M1BNR4;M1CZI3;M1AHN5;M0ZHT9;DES|comp94291_c0_seq1;M0ZI19;M0ZI18	DES|comp80774_c0_seq1;DUL|comp7383_c0_seq1;M1CNK7;DES|comp69011_c0_seq1;DES|comp76812_c0_seq1;DES|comp76377_c0_seq1;M1BNR4;M1CZI3;M1AHN5;M0ZHT9;DES|comp94291_c0_seq1;M0ZI19;M0ZI18	PGSC0003DMP400048253	Hsc70
2	2	1	1	2	2	1	0	1	0	M1C5J8;DES|comp81177_c0_seq1;M1D6H5;DES|comp81906_c0_seq2;DUL|comp25733_c0_seq1	M1C5J8;DES|comp81177_c0_seq1;M1D6H5;DES|comp81906_c0_seq2;DUL|comp25733_c0_seq1	PGSC0003DMP400040582	Biotin carboxylase carrier protein
0	0	0	0	0	0	0	0	1	1	M1A8P1;DES|comp81260_c0_seq1;M1A8P0	M1A8P1;DES|comp81260_c0_seq1;M1A8P0	PGSC0003DMP400011864	CXE carboxylesterase
2	2	1	2	1	3	1	1	2	1	DES|comp81644_c0_seq1;M0ZMG2	DES|comp81644_c0_seq1;M0ZMG2	PGSC0003DMP400002757	Class II chitinase
0	0	0	0	0	0	0	0	2	3	M0ZYD7;DES|comp81770_c0_seq2;M0ZYD8	M0ZYD7;DES|comp81770_c0_seq2	PGSC0003DMP400007441	Conserved gene of unknown function
2	1	0	1	0	1	1	1	1	2	DES|comp82160_c0_seq1;M1D578	DES|comp82160_c0_seq1	PGSC0003DMP400055404	Peroxidase
0	0	0	0	0	0	0	0	0	0	M1CU70;M1CU69;DES|comp82253_c0_seq3;DUL|comp24135_c0_seq1;M1CU71;M1CU68;M1CU72	M1CU70;M1CU69;DES|comp82253_c0_seq3;DUL|comp24135_c0_seq1;M1CU71;M1CU68;M1CU72	PGSC0003DMP400050663	Mta/sah nucleosidase
1	0	0	0	0	0	0	0	0	0	DES|comp82313_c0_seq4;M1B8Q1;M1B8Q0	DES|comp82313_c0_seq4;M1B8Q1;M1B8Q0	PGSC0003DMP400026939	CT099
0	0	2	1	0	0	0	0	0	0	DES|comp82528_c0_seq1;DUL|comp6164_c0_seq1	DES|comp82528_c0_seq1;DUL|comp6164_c0_seq1	PGSC0003DMP400011982	Serine carboxypeptidase
1	0	0	0	0	0	0	0	1	1	M1AC28;M1AC30;M1AC27;M1CN80;M1BWS8;DUL|comp24064_c0_seq1;DES|comp82818_c0_seq1;DUL|comp22896_c0_seq3	M1AC28;M1AC30;M1AC27;M1CN80;M1BWS8;DUL|comp24064_c0_seq1;DES|comp82818_c0_seq1;DUL|comp22896_c0_seq3	PGSC0003DMP400013303	Glycolate oxidase
0	0	0	0	0	0	0	0	3	2	DES|comp84159_c0_seq1;M0ZRD6	DES|comp84159_c0_seq1;M0ZRD6	PGSC0003DMP400004464	Zinc finger protein
2	1	2	1	1	1	1	1	1	1	Q941G6;DES|comp84286_c0_seq1	Q941G6;DES|comp84286_c0_seq1		Pathogenesis-related protein 1b
0	0	0	0	0	0	0	0	0	0	M1C451;K7WJW2;DUL|comp22537_c0_seq2;DES|comp84357_c0_seq2	M1C451;K7WJW2;DUL|comp22537_c0_seq2;DES|comp84357_c0_seq2	PGSC0003DMP400039951	Putative 40S ribosomal protein S9
0	0	0	0	1	0	0	0	0	0	DUL|comp13340_c0_seq1;M1C0V6;DUL|comp15263_c0_seq1;DES|comp84515_c0_seq1;Q2PYX3;M1CQP6;DES|comp86260_c0_seq1;DUL|comp20867_c0_seq2	DUL|comp13340_c0_seq1;M1C0V6;DUL|comp15263_c0_seq1;DES|comp84515_c0_seq1;Q2PYX3;M1CQP6;DES|comp86260_c0_seq1;DUL|comp20867_c0_seq2	PGSC0003DMP400049131	Fructose-bisphosphate aldolase
0	0	0	0	0	0	0	0	0	0	DES|comp84675_c0_seq1;M1D1X9;M1D1X8;DES|comp66880_c0_seq1;DUL|comp17336_c0_seq3;M1D1X7;M1C1C4	DES|comp84675_c0_seq1;M1D1X9;M1D1X8;DES|comp66880_c0_seq1;DUL|comp17336_c0_seq3;M1D1X7;M1C1C4	PGSC0003DMP400053911	Beta-galactosidase
4	10	13	6	1	0	0	0	1	0	M1A468;DES|comp84775_c0_seq1;M1A467;M1BNA8;M1BNA7	M1A468;DES|comp84775_c0_seq1;M1A467	PGSC0003DMP400009956	Beta-mannosidase
0	0	0	0	0	0	0	2	0	0	M1AQ88;DES|comp84806_c0_seq2	M1AQ88;DES|comp84806_c0_seq2	PGSC0003DMP400018956	GDSL-motif lipase/hydrolase family protein
0	0	0	0	0	0	0	0	0	2	DES|comp85082_c0_seq1;M1C140	DES|comp85082_c0_seq1;M1C140	PGSC0003DMP400038664	Zinc finger protein
0	1	0	0	0	0	0	0	0	0	DES|comp85158_c1_seq1	DES|comp85158_c1_seq1	PGSC0003DMP400046981	Kunitz trypsin inhibitor
0	1	0	0	1	1	0	0	0	0	M1A035;DES|comp85226_c0_seq2;M1A034;DUL|comp23135_c0_seq2;M1A036	M1A035;DES|comp85226_c0_seq2;M1A034;DUL|comp23135_c0_seq2	M1A035	Carboxypeptidase
1	0	0	0	0	1	1	2	0	0	DES|comp85252_c0_seq4;M1AEB9;M1AEC2;M1AEC1;M1AEC0;DES|comp83304_c0_seq1;M1A146;M1D7B1;M1D7B3;M1A147	DES|comp85252_c0_seq4;M1AEB9;M1AEC2	PGSC0003DMP400014267	Beta-galactosidase
0	0	0	0	0	0	0	0	0	0	M1AAX9;DES|comp85253_c0_seq1	M1AAX9;DES|comp85253_c0_seq1	PGSC0003DMP400012806	Xylem serine proteinase 1
6	11	12	14	18	16	6	10	9	5	DES|comp85598_c0_seq1;DES|comp82015_c0_seq1	DES|comp85598_c0_seq1	PGSC0003DMP400000884	Serine carboxypeptidase III
0	0	0	0	0	0	0	0	1	0	M1BJA2;DES|comp85748_c0_seq1	M1BJA2;DES|comp85748_c0_seq1	PGSC0003DMP400031513	Aldose 1-epimerase
1	0	0	0	0	0	0	0	0	0	M1CQ02;DUL|comp23681_c0_seq1;DES|comp85793_c0_seq1;DUL|comp26201_c0_seq1;DES|comp87390_c0_seq1;M1AGR8	M1CQ02;DUL|comp23681_c0_seq1;DES|comp85793_c0_seq1;DUL|comp26201_c0_seq1;DES|comp87390_c0_seq1;M1AGR8	PGSC0003DMP400048869	Methionine synthase
1	0	0	0	0	0	0	0	0	0	DES|comp85859_c0_seq1	DES|comp85859_c0_seq1	PGSC0003DMP400012806	Xylem serine proteinase 1
5	6	1	0	0	0	0	0	0	0	DES|comp86425_c0_seq1;M1AAV4	DES|comp86425_c0_seq1
1	1	1	1	1	1	1	3	3	2	DES|comp86513_c1_seq2	DES|comp86513_c1_seq2	PGSC0003DMP400041742	PAE
0	0	2	2	1	0	0	0	0	0	M1AW19;DES|comp86579_c0_seq1;DUL|comp20456_c0_seq1	M1AW19;DES|comp86579_c0_seq1	PGSC0003DMP400021481	Polygalacturonase
1	0	0	0	0	0	0	0	1	2	DES|comp86580_c0_seq2;M1CL27;M1CL28	DES|comp86580_c0_seq2;M1CL27;M1CL28	PGSC0003DMP400047118	Chloroplast sedoheptulose-1,7-bisphosphatase
1	0	0	0	0	1	0	0	1	0	M1CZH9;M1B9C1;M0ZHU8;DES|comp86662_c1_seq1	M1CZH9;M1B9C1;M0ZHU8;DES|comp86662_c1_seq1	PGSC0003DMP400068683	Histone H4
1	0	1	1	0	0	0	0	0	0	M1AIV9;DES|comp86736_c0_seq2;M1AIV8	M1AIV9;DES|comp86736_c0_seq2	PGSC0003DMP400016183	Pectinesterase
0	0	0	0	0	0	1	0	0	0	M1CU73;DUL|comp6918_c0_seq1;DES|comp86859_c0_seq1	M1CU73;DUL|comp6918_c0_seq1;DES|comp86859_c0_seq1	PGSC0003DMP400050666	Conserved gene of unknown function
0	0	0	0	1	0	0	0	0	0	DUL|comp10723_c0_seq1;DES|comp86913_c0_seq3;M0ZRS0	DUL|comp10723_c0_seq1;DES|comp86913_c0_seq3;M0ZRS0	PGSC0003DMP400004613	Chaperonin-60kD, ch60
1	5	4	2	0	0	0	0	0	0	DES|comp87037_c0_seq5	DES|comp87037_c0_seq5
0	0	0	0	0	0	2	5	5	0	M1AHV8;DES|comp87074_c0_seq1;M1AHV7	M1AHV8;DES|comp87074_c0_seq1;M1AHV7	PGSC0003DMP400015773	Carboxylic ester hydrolase
0	0	0	0	0	0	0	0	1	0	M1CFR3;DES|comp87099_c0_seq1	M1CFR3;DES|comp87099_c0_seq1	PGSC0003DMP400044870	Serine-threonine protein kinase, plant-type
0	0	0	0	0	0	0	0	0	0	M1BWH6;M1AKV3;DUL|comp21535_c0_seq1;DES|comp87183_c0_seq1	M1BWH6;M1AKV3;DUL|comp21535_c0_seq1;DES|comp87183_c0_seq1	PGSC0003DMP400036693	Proteasome subunit alpha type
1	1	1	2	3	8	0	0	0	0	DES|comp87253_c0_seq2;M1D0Z2;M1D0Z1	DES|comp87253_c0_seq2;M1D0Z2;M1D0Z1	PGSC0003DMP400053497	Heparanase
0	0	0	0	0	0	0	0	0	0	M1C7V6;M1C7V8;M1C7V7;DUL|comp16968_c0_seq1;DES|comp87480_c0_seq1	M1C7V6;M1C7V8;M1C7V7;DUL|comp16968_c0_seq1;DES|comp87480_c0_seq1	PGSC0003DMP400041520	Chaperonin-60 beta subunit
1	0	0	0	0	0	0	0	1	1	DES|comp87561_c1_seq1;M1AJF6;DUL|comp19486_c0_seq1	DES|comp87561_c1_seq1;M1AJF6;DUL|comp19486_c0_seq1	PGSC0003DMP400016435	Phosphoribulokinase
0	1	0	0	0	1	0	2	2	0	M1B7Y8;DES|comp87588_c0_seq1	M1B7Y8;DES|comp87588_c0_seq1	PGSC0003DMP400026614	Esterase
2	2	1	1	0	1	1	1	1	1	DES|comp87943_c0_seq2	DES|comp87943_c0_seq2	PGSC0003DMP400018522	Subtilase
8	3	0	0	0	0	0	0	0	0	M1CC25;DES|comp87959_c0_seq1;DES|comp83080_c0_seq1;M1B6Z5;DUL|comp17406_c0_seq1	M1CC25;DES|comp87959_c0_seq1	PGSC0003DMP400043338	Subtilisin-like protease
1	0	0	0	0	0	0	0	0	0	DES|comp89039_c0_seq1;M0ZY80;M0ZY78;M0ZY79;M0ZY81	DES|comp89039_c0_seq1;M0ZY80;M0ZY78;M0ZY79;M0ZY81		WAT1-related protein
0	0	0	0	0	0	0	0	2	0	M0ZJ56;M0ZJ57;DES|comp89599_c1_seq1	M0ZJ56;M0ZJ57;DES|comp89599_c1_seq1	PGSC0003DMP400001346	Zinc finger protein
0	0	0	0	0	0	2	1	1	0	M1AAC5;DES|comp89860_c0_seq1;M1AAC6;M1AAC3;M1AAC4	M1AAC5;DES|comp89860_c0_seq1;M1AAC6	PGSC0003DMP400012583	Conserved gene of unknown function
2	0	0	0	0	0	0	0	0	1	M1BFT7;DUL|comp6792_c0_seq1;DES|comp89997_c0_seq1;DUL|comp5034_c0_seq1;M1CGF9;M1CGF8;DES|comp84680_c0_seq2	M1BFT7;DUL|comp6792_c0_seq1;DES|comp89997_c0_seq1;DUL|comp5034_c0_seq1;M1CGF9;M1CGF8;DES|comp84680_c0_seq2	PGSC0003DMP400029983	Malate dehydrogenase
3	11	1	0	0	1	1	0	0	0	DES|comp90199_c0_seq1	DES|comp90199_c0_seq1	PGSC0003DMP400016778	Periplasmic beta-glucosidase
4	6	9	6	3	4	0	3	3	2	M1BIX8;DES|comp90250_c0_seq1;DUL|comp20540_c0_seq1	M1BIX8;DES|comp90250_c0_seq1	PGSC0003DMP400031346	Reticuline oxidase
0	0	0	0	0	0	0	0	0	0	DES|comp90629_c0_seq1;M1AX44;DUL|comp24871_c0_seq1	DES|comp90629_c0_seq1;M1AX44;DUL|comp24871_c0_seq1	PGSC0003DMP400021915	Malate dehydrogenase
1	1	0	0	0	0	0	0	1	0	DUL|comp43709_c0_seq1;M0ZTM7;DES|comp90683_c0_seq4;M0ZTN1;M0ZTQ5;M0ZTQ4	DUL|comp43709_c0_seq1;M0ZTM7;DES|comp90683_c0_seq4;M0ZTN1;M0ZTQ5;M0ZTQ4	PGSC0003DMP400005463	Osmotin
3	5	3	3	2	4	5	10	9	3	DES|comp90846_c1_seq1	DES|comp90846_c1_seq1	PGSC0003DMP400040088	41 kD chloroplast nucleoid DNA binding protein (CND41)
1	0	0	0	0	0	0	0	0	0	M1CSW6;DES|comp90939_c0_seq2;M1CSW5	M1CSW6;DES|comp90939_c0_seq2;M1CSW5	PGSC0003DMP400050057	Subtilase family protein
1	0	0	1	0	0	0	1	1	0	DES|comp90974_c0_seq1;M1ATR3;M1BBG9;M1BBH0	DES|comp90974_c0_seq1;M1ATR3;M1BBG9;M1BBH0	PGSC0003DMP400020467	Anthocyanin acyltransferase
2	1	2	1	1	1	1	1	1	1	DES|comp91140_c0_seq2	DES|comp91140_c0_seq2	PGSC0003DMP400051976	Glucan endo-1,3-beta-D-glucosidase
0	0	2	2	2	1	0	0	0	0	DES|comp91208_c0_seq3;M1D0R3	DES|comp91208_c0_seq3;M1D0R3	PGSC0003DMP400053407	Glycosyl hydrolase family 3 protein
8	12	2	3	3	4	3	4	2	1	DES|comp91298_c0_seq1;M1CWU3;M1CWU2;M1CWU1	DES|comp91298_c0_seq1;M1CWU3;M1CWU2	PGSC0003DMP400051806	LEXYL2 protein
0	1	0	0	0	0	0	0	0	0	DES|comp91343_c0_seq1	DES|comp91343_c0_seq1	PGSC0003DMP400033415	Beta-glucosidase 41
1	0	0	0	0	0	0	0	0	0	DES|comp91352_c0_seq1;M0ZRS7;M0ZRS6	DES|comp91352_c0_seq1;M0ZRS7	PGSC0003DMP400004621	Beta-galactosidase
1	1	0	0	0	0	0	0	0	0	M1AM37;M1AM36;DES|comp91393_c0_seq1	M1AM37;M1AM36;DES|comp91393_c0_seq1	PGSC0003DMP400017594	Pectinesterase
0	0	0	0	0	0	1	2	1	0	DES|comp91634_c0_seq3;M0ZLR5;M0ZLR4;DUL|comp20357_c0_seq1;M0ZLR6	DES|comp91634_c0_seq3;M0ZLR5;M0ZLR4;DUL|comp20357_c0_seq1;M0ZLR6	PGSC0003DMP400002476	Phospholipase C
1	0	0	1	0	0	1	0	1	0	M1D510;DES|comp91716_c0_seq1	M1D510;DES|comp91716_c0_seq1	PGSC0003DMP400055213	Conserved gene of unknown function
0	0	0	0	0	0	1	2	0	0	DES|comp91788_c0_seq9	DES|comp91788_c0_seq9	PGSC0003DMP400042675	Heparanase-2
1	0	0	0	0	0	0	0	0	0	M1AY17;DES|comp91817_c0_seq1	M1AY17;DES|comp91817_c0_seq1	M1AY17	Peroxidase
15	36	25	13	10	10	11	13	13	8	DES|comp91831_c0_seq1;M1C3Q2	DES|comp91831_c0_seq1;M1C3Q2	PGSC0003DMP400039774	Auxin-induced beta-glucosidase
0	0	0	0	0	1	0	0	0	0	M1B434;DUL|comp16151_c0_seq1;M1B435;DES|comp92242_c0_seq1;DES|comp77341_c0_seq1;M1CTM1;M1CTM2	M1B434;DUL|comp16151_c0_seq1;M1B435;DES|comp92242_c0_seq1;DES|comp77341_c0_seq1;M1CTM1;M1CTM2	PGSC0003DMP400024892	Aspartic proteinase nepenthesin-1
0	2	0	0	0	1	0	2	3	3	DES|comp92264_c0_seq1	DES|comp92264_c0_seq1	PGSC0003DMP400005002	Zinc finger protein
0	0	0	0	0	0	1	0	0	0	M1BZM1;DES|comp92322_c0_seq4	M1BZM1;DES|comp92322_c0_seq4	PGSC0003DMP400038055	Conserved gene of unknown function
6	7	7	5	5	6	9	10	6	2	M1A3D8;DES|comp92394_c0_seq1	M1A3D8;DES|comp92394_c0_seq1	PGSC0003DMP400009572	Aspartic proteinase nepenthesin-1
2	0	0	0	0	0	0	0	0	0	M1A8Y4;DES|comp92444_c0_seq1	M1A8Y4;DES|comp92444_c0_seq1	PGSC0003DMP400011990	Subtilase
0	1	0	0	0	1	0	0	0	0	DES|comp92477_c0_seq1	DES|comp92477_c0_seq1	PGSC0003DMP400037597	F-Box protein
1	0	1	1	0	0	0	0	0	0	DUL|comp29231_c0_seq1;M1ARI6;M1ARI7;M0ZSD6;DES|comp92492_c0_seq2;DUL|comp24174_c0_seq1	DUL|comp29231_c0_seq1;M1ARI6;M1ARI7;M0ZSD6;DES|comp92492_c0_seq2;DUL|comp24174_c0_seq1	PGSC0003DMP400019506	Enolase
7	0	0	0	0	0	0	0	0	0	DES|comp92877_c0_seq2;M1CMP3;M1CMP2	DES|comp92877_c0_seq2;M1CMP3	PGSC0003DMP400047848	Periplasmic beta-glucosidase
0	0	0	0	0	1	0	0	0	0	M0ZZ66;DES|comp93105_c0_seq1;DUL|comp16457_c0_seq1	M0ZZ66;DES|comp93105_c0_seq1;DUL|comp16457_c0_seq1	PGSC0003DMP400007784	Ceramidase
0	0	0	0	0	0	0	0	0	0	M1BB97;M1BB98;M1BB95;M1BB96;DUL|comp22926_c1_seq1;DES|comp93247_c0_seq2	M1BB97;M1BB98;M1BB95;M1BB96;DUL|comp22926_c1_seq1;DES|comp93247_c0_seq2	PGSC0003DMP400028028	Alpha-glucosidase
0	0	0	0	0	0	0	0	0	0	M1CI68;M1CI69;DES|comp93293_c0_seq1;DUL|comp22514_c0_seq1	M1CI68;M1CI69;DES|comp93293_c0_seq1;DUL|comp22514_c0_seq1	PGSC0003DMP400045893	Beta-galactosidase
0	1	1	1	1	5	1	1	1	0	M1D2F3;DES|comp93346_c0_seq2	M1D2F3;DES|comp93346_c0_seq2	PGSC0003DMP400054112	Carboxypeptidase
0	0	0	0	0	0	0	0	2	0	DES|comp93528_c0_seq1	DES|comp93528_c0_seq1
0	1	1	1	0	0	0	0	0	0	M1BXV3;DES|comp93761_c0_seq1	M1BXV3;DES|comp93761_c0_seq1	PGSC0003DMP400037294	SBT1 protein
0	0	0	0	0	1	0	0	0	0	DUL|comp8265_c0_seq1;DES|comp93958_c0_seq5;M1D6H2	DUL|comp8265_c0_seq1;DES|comp93958_c0_seq5;M1D6H2	PGSC0003DMP400055811	Heparanase-2
0	0	1	1	0	0	0	0	0	0	DES|comp94382_c0_seq8	DES|comp94382_c0_seq8
0	1	0	0	0	1	0	1	1	0	DES|comp94458_c0_seq2	DES|comp94458_c0_seq2
8	3	4	4	2	2	1	1	1	1	DES|comp95360_c0_seq1	DES|comp95360_c0_seq1	PGSC0003DMP400007010	Serine protease
0	0	0	0	1	0	0	0	0	0	M0ZKF0;Q2VEH0;DUL|comp7053_c0_seq1;DES|comp95439_c0_seq1	M0ZKF0;Q2VEH0;DUL|comp7053_c0_seq1;DES|comp95439_c0_seq1	PGSC0003DMP400001921	ATP synthase subunit beta, chloroplastic
1	0	0	0	0	0	0	0	1	0	M1CC22;DES|comp95566_c0_seq1;M1CC21;DUL|comp29424_c0_seq1;M0ZY43	M1CC22;DES|comp95566_c0_seq1;M1CC21	PGSC0003DMP400043334	Peroxidase
7	0	0	0	0	0	0	0	0	0	DES|comp95846_c0_seq1;M1C2S4;M1BBG6	DES|comp95846_c0_seq1;M1C2S4	PGSC0003DMP400039404	Subtilisin-like protease
0	1	1	1	0	0	0	0	0	0	DUL|comp10852_c0_seq2;DES|comp94707_c0_seq16	DUL|comp10852_c0_seq2	PGSC0003DMP400032609	Amidase family protein
0	0	0	0	0	0	0	0	0	0	DUL|comp12188_c1_seq1	DUL|comp12188_c1_seq1	PGSC0003DMP400054671	Pectin acetylesterase
0	0	0	0	0	0	1	0	0	0	DUL|comp12986_c0_seq3	DUL|comp12986_c0_seq3
0	1	0	0	0	0	0	0	0	0	M1AKP2;DUL|comp13265_c0_seq1	M1AKP2;DUL|comp13265_c0_seq1	PGSC0003DMP400016965	Hydrolase, hydrolyzing O-glycosyl compounds
0	0	0	0	0	0	0	0	0	0	DUL|comp13311_c0_seq1	DUL|comp13311_c0_seq1	PGSC0003DMP400023053	24K germin
0	0	0	0	0	0	0	0	0	0	DUL|comp13433_c0_seq1	DUL|comp13433_c0_seq1
0	0	0	0	0	0	0	0	0	0	DUL|comp13733_c0_seq1;M1AUY9;DES|comp87141_c0_seq1	DUL|comp13733_c0_seq1;M1AUY9;DES|comp87141_c0_seq1	PGSC0003DMP400021005	Chitinase
0	0	0	0	0	0	0	0	0	0	DUL|comp14140_c0_seq1;M1CE45;DES|comp88393_c0_seq1	DUL|comp14140_c0_seq1
0	0	0	0	0	0	0	0	0	0	DUL|comp14787_c0_seq4	DUL|comp14787_c0_seq4	PGSC0003DMP400001891	Zinc finger protein
0	0	0	0	0	0	0	0	0	0	DUL|comp14861_c0_seq2	DUL|comp14861_c0_seq2	PGSC0003DMP400042674	Heparanase-2
0	0	0	0	0	0	0	0	0	0	DUL|comp14939_c0_seq1	DUL|comp14939_c0_seq1	PGSC0003DMP400027551	PAE
1	0	1	1	1	1	0	0	0	0	DUL|comp15095_c0_seq1	DUL|comp15095_c0_seq1	PGSC0003DMP400012644	Serine carboxypeptidase III
0	0	0	0	0	0	0	0	0	0	DUL|comp15155_c0_seq1	DUL|comp15155_c0_seq1	PGSC0003DMP400010542	Beta-D-glucan exohydrolase
0	2	2	6	0	1	0	1	1	1	DUL|comp15505_c0_seq2	DUL|comp15505_c0_seq2	PGSC0003DMP400015021	Cellulase containing protein
0	0	0	0	0	0	0	0	0	0	DUL|comp15740_c0_seq1;DES|comp89730_c0_seq2;M1A782	DUL|comp15740_c0_seq1	PGSC0003DMP400011213	Beta-glucosidase 01
0	0	0	0	0	0	0	0	0	0	DUL|comp16118_c0_seq2	DUL|comp16118_c0_seq2	PGSC0003DMP400025803	Nucellin
1	1	1	0	1	0	1	1	1	3	DUL|comp16163_c0_seq1;M0ZZ70;M0ZZ71	DUL|comp16163_c0_seq1	PGSC0003DMP400018078	Alpha galactosidase
0	0	0	0	0	0	0	0	0	0	DUL|comp16358_c0_seq1	DUL|comp16358_c0_seq1	PGSC0003DMP400015349	Beta-1,3-glucanase
0	0	0	0	0	0	0	0	0	0	DUL|comp16711_c1_seq1	DUL|comp16711_c1_seq1	PGSC0003DMP400020791	Alpha-galactosidase/alpha-n-acetylgalactosaminidase
0	0	0	0	0	0	0	0	0	0	DUL|comp16725_c0_seq1;M1AXZ2;DES|comp92243_c0_seq1	DUL|comp16725_c0_seq1	PGSC0003DMP400022271	Erg-1
1	0	1	0	0	0	0	0	1	1	DUL|comp16909_c0_seq1	DUL|comp16909_c0_seq1	PGSC0003DMP400016183	Pectinesterase
1	0	0	0	0	0	0	0	1	1	DUL|comp17003_c0_seq2	DUL|comp17003_c0_seq2	PGSC0003DMP400055305	Peroxidase
1	0	0	0	0	0	0	0	0	0	DUL|comp17053_c0_seq1	DUL|comp17053_c0_seq1	PGSC0003DMP400013997	Subtilisin-like protease preproenzyme
0	0	0	0	0	0	0	0	1	2	DUL|comp17144_c0_seq1;M0ZRD7;M0ZRD8	DUL|comp17144_c0_seq1	PGSC0003DMP400004464	Zinc finger protein
1	0	0	0	0	0	0	0	0	0	DUL|comp17176_c0_seq1	DUL|comp17176_c0_seq1	PGSC0003DMP400022299	Cationic peroxidase
0	0	0	0	0	0	0	0	0	0	DUL|comp17299_c0_seq1	DUL|comp17299_c0_seq1	PGSC0003DMP400009572	Aspartic proteinase nepenthesin-1
0	1	0	0	0	0	0	0	0	0	DUL|comp17398_c0_seq5	DUL|comp17398_c0_seq5	PGSC0003DMP400039774	Auxin-induced beta-glucosidase
0	0	0	0	0	0	0	0	2	0	DUL|comp17711_c0_seq2	DUL|comp17711_c0_seq2	PGSC0003DMP400031771	Pectinacetylesterase
0	0	0	0	0	0	0	0	0	0	DUL|comp18332_c0_seq5	DUL|comp18332_c0_seq5
0	0	0	0	0	0	0	0	0	0	DUL|comp1843_c0_seq1	DUL|comp1843_c0_seq1	PGSC0003DMP400016780	Periplasmic beta-glucosidase
0	0	0	0	0	0	0	0	0	0	DUL|comp19277_c0_seq3	DUL|comp19277_c0_seq3	PGSC0003DMP400011450	Chlorophyllase
0	0	0	0	0	0	0	0	0	0	DUL|comp19435_c0_seq1	DUL|comp19435_c0_seq1	PGSC0003DMP400025379	Fasciclin-like arabinogalactan protein 10
0	0	0	0	0	0	0	0	0	0	DUL|comp19515_c0_seq1;M0ZVR1;DES|comp72410_c0_seq1	DUL|comp19515_c0_seq1;M0ZVR1;DES|comp72410_c0_seq1	PGSC0003DMP400006368	Ferredoxin--NADP reductase, leaf-type isozyme, chloroplastic
0	0	0	0	0	0	0	0	0	0	DUL|comp19557_c0_seq1;M1CFH3;DES|comp90680_c0_seq1	DUL|comp19557_c0_seq1
0	0	0	1	0	0	0	0	0	0	DUL|comp19818_c0_seq1	DUL|comp19818_c0_seq1	PGSC0003DMP400043391	Protein kinase
0	0	0	0	0	0	0	0	0	0	DUL|comp19920_c0_seq1	DUL|comp19920_c0_seq1
0	0	0	0	0	0	0	0	0	0	DUL|comp20203_c0_seq1	DUL|comp20203_c0_seq1	PGSC0003DMP400002359	Non-cell-autonomous protein pathway1
0	0	0	0	0	0	0	0	0	0	DUL|comp20300_c0_seq1;M1CZQ6	DUL|comp20300_c0_seq1	PGSC0003DMP400047848	Periplasmic beta-glucosidase
0	0	0	0	0	0	0	0	0	0	DUL|comp20392_c0_seq1	DUL|comp20392_c0_seq1	PGSC0003DMP400026688	Beta-galactosidase
0	0	0	0	0	0	0	0	0	0	DUL|comp20470_c0_seq1	DUL|comp20470_c0_seq1
2	0	0	0	0	0	0	0	0	0	DUL|comp20896_c0_seq1;M1AI61	DUL|comp20896_c0_seq1;M1AI61	PGSC0003DMP400015895	Beta-glucosidase
0	0	0	0	0	0	0	0	0	0	DUL|comp20965_c0_seq1	DUL|comp20965_c0_seq1	PGSC0003DMP400040088	41 kD chloroplast nucleoid DNA binding protein (CND41)
0	0	0	0	0	0	0	0	0	0	DUL|comp21051_c0_seq1	DUL|comp21051_c0_seq1	PGSC0003DMP400026173	Peroxidase
12	43	10	12	11	15	9	11	10	7	DUL|comp21162_c0_seq1	DUL|comp21162_c0_seq1
0	0	0	0	0	0	0	0	0	0	DUL|comp21231_c1_seq6;M1CT35;M1CT34	DUL|comp21231_c1_seq6;M1CT35;M1CT34	PGSC0003DMP400050143	Carboxypeptidase
0	0	0	0	0	0	0	0	0	0	DUL|comp21643_c0_seq1	DUL|comp21643_c0_seq1
0	0	0	0	0	0	0	0	0	0	DUL|comp21774_c1_seq1	DUL|comp21774_c1_seq1	PGSC0003DMP400044937	Serine carboxypeptidase
4	1	0	0	0	0	0	0	0	0	DUL|comp21775_c0_seq1;M1BNH4	DUL|comp21775_c0_seq1
3	7	1	0	2	1	1	1	1	0	DUL|comp21868_c0_seq1;M1AKB4	DUL|comp21868_c0_seq1	PGSC0003DMP400016778	Periplasmic beta-glucosidase
1	0	1	0	1	0	1	0	1	0	M1A1P4;M1AGX9;M0ZLG7;M1ATR5;DUL|comp21928_c0_seq1	M1A1P4;M1AGX9;M0ZLG7;M1ATR5;DUL|comp21928_c0_seq1	PGSC0003DMP400008843	Alpha-tubulin
1	0	0	0	0	0	0	0	0	0	DUL|comp21971_c0_seq2;M1CLM3;DES|comp94758_c0_seq2;M1CLM2;M1CLM4	DUL|comp21971_c0_seq2;M1CLM3;DES|comp94758_c0_seq2;M1CLM2	PGSC0003DMP400047341	Hydrolase, hydrolyzing O-glycosyl compounds
0	0	0	0	0	0	0	0	0	0	DUL|comp22623_c0_seq3	DUL|comp22623_c0_seq3	PGSC0003DMP400017417	Zinc finger protein
3	2	2	3	5	8	2	2	1	1	DUL|comp22754_c0_seq3	DUL|comp22754_c0_seq3	PGSC0003DMP400053498	Heparanase
4	1	1	0	0	0	0	0	0	0	DUL|comp22794_c0_seq2;M0ZTK1;DES|comp87403_c0_seq1;DES|comp87403_c1_seq1	DUL|comp22794_c0_seq2;M0ZTK1	PGSC0003DMP400005427	Beta-D-glucan exohydrolase
0	0	0	0	0	0	0	0	0	0	DUL|comp22951_c0_seq1	DUL|comp22951_c0_seq1	PGSC0003DMP400049954	Pectinesterase-2
0	0	0	0	0	0	0	0	0	0	DUL|comp23462_c0_seq1;M1BNZ0;M1BNZ2	DUL|comp23462_c0_seq1
1	1	1	0	0	0	0	0	1	0	DUL|comp23499_c0_seq1;M1D7L6;DES|comp71810_c0_seq1	DUL|comp23499_c0_seq1;M1D7L6;DES|comp71810_c0_seq1	PGSC0003DMP400056271	Acidic endochitinase
2	0	0	0	0	0	0	0	0	0	DUL|comp23536_c0_seq2	DUL|comp23536_c0_seq2
0	0	0	0	0	0	0	0	0	0	DUL|comp23540_c0_seq1	DUL|comp23540_c0_seq1	PGSC0003DMP400019475	Heparanase
0	0	0	0	0	0	0	0	0	0	DUL|comp23572_c0_seq1	DUL|comp23572_c0_seq1	PGSC0003DMP400023758	Zinc finger protein
7	0	0	0	0	0	0	0	0	0	DUL|comp23654_c0_seq1;M1AR95;M1AP98	DUL|comp23654_c0_seq1	PGSC0003DMP400018522	Subtilase
0	0	0	0	0	0	0	0	0	0	DUL|comp23699_c0_seq1	DUL|comp23699_c0_seq1	PGSC0003DMP400043338	Subtilisin-like protease
1	3	0	0	3	5	6	3	1	0	DUL|comp23786_c0_seq13	DUL|comp23786_c0_seq13	PGSC0003DMP400014264	Beta-galactosidase
0	0	0	0	0	0	0	0	0	0	DUL|comp23903_c0_seq1	DUL|comp23903_c0_seq1	PGSC0003DMP400053698	Phi-1 protein
3	0	0	0	0	0	0	0	0	0	DUL|comp23931_c0_seq1	DUL|comp23931_c0_seq1	PGSC0003DMP400006965	Serine protease
0	0	0	0	0	0	0	0	0	0	DUL|comp24024_c0_seq43	DUL|comp24024_c0_seq43	PGSC0003DMP400053408	Glycosyl hydrolase family 3 protein
0	1	0	0	0	1	0	0	0	0	DUL|comp24037_c0_seq1;P26574;M1BQ74;DES|comp76665_c0_seq2	DUL|comp24037_c0_seq1;P26574;M1BQ74;DES|comp76665_c0_seq2	PGSC0003DMP400034002	Ribulose bisphosphate carboxylase small chain 1
0	0	0	0	0	0	0	0	0	0	DUL|comp24111_c0_seq1	DUL|comp24111_c0_seq1
1	0	0	0	0	0	2	4	3	0	DUL|comp24116_c0_seq1	DUL|comp24116_c0_seq1	PGSC0003DMP400010972	Hydroxypyruvate reductase
1	3	2	1	2	1	0	2	1	3	DUL|comp24123_c0_seq1;M1A7U3	DUL|comp24123_c0_seq1	PGSC0003DMP400011470	GDSL-like Lipase/Acylhydrolase family protein
0	0	0	0	0	0	0	0	1	4	DUL|comp24125_c0_seq1	DUL|comp24125_c0_seq1	PGSC0003DMP400047117	Chloroplast sedoheptulose-1,7-bisphosphatase
0	0	0	0	0	0	0	0	0	0	DUL|comp24128_c0_seq1	DUL|comp24128_c0_seq1	PGSC0003DMP400024701	Germin
0	0	0	0	0	0	0	0	0	0	DUL|comp24157_c0_seq1	DUL|comp24157_c0_seq1
0	0	0	0	0	0	0	0	0	0	DUL|comp24187_c0_seq1	DUL|comp24187_c0_seq1	PGSC0003DMP400002757	Class II chitinase
0	0	0	0	0	0	0	0	0	0	DUL|comp24204_c0_seq1	DUL|comp24204_c0_seq1
0	0	0	0	0	0	0	0	0	0	DUL|comp24280_c0_seq1	DUL|comp24280_c0_seq1	PGSC0003DMP400049824	Alpha-L-fucosidase 2
0	0	0	0	0	0	0	0	0	0	DUL|comp24321_c0_seq1;M1A423;DES|comp80901_c0_seq1;M0ZY08;M0ZY07	DUL|comp24321_c0_seq1	PGSC0003DMP400009908	Aspartic proteinase nepenthesin-1
0	0	0	0	0	0	0	0	1	2	DUL|comp24335_c0_seq1;M0ZI96;DES|comp85851_c0_seq1	DUL|comp24335_c0_seq1;M0ZI96;DES|comp85851_c0_seq1	PGSC0003DMP400000966	Serine-type peptidase
0	0	0	0	0	0	0	0	0	0	DUL|comp24414_c0_seq1	DUL|comp24414_c0_seq1
0	0	1	1	1	0	0	0	0	0	DUL|comp24565_c0_seq1;M1BEU2;DES|comp84394_c0_seq1	DUL|comp24565_c0_seq1	PGSC0003DMP400029544	Serine-threonine protein kinase, plant-type
0	0	0	0	0	0	0	0	0	0	DUL|comp24621_c0_seq1	DUL|comp24621_c0_seq1	PGSC0003DMP400034826	Zinc finger protein
0	0	0	0	0	0	0	0	0	0	DUL|comp24744_c0_seq1;M1AYQ6;DES|comp72531_c0_seq1	DUL|comp24744_c0_seq1;M1AYQ6;DES|comp72531_c0_seq1	PGSC0003DMP400022582	Fasciclin-like arabinogalactan protein 13
0	0	0	0	0	0	0	1	2	1	DUL|comp24761_c0_seq1	DUL|comp24761_c0_seq1	PGSC0003DMP400001347	Zinc finger protein
0	0	0	0	0	0	0	0	0	1	DUL|comp24798_c0_seq1	DUL|comp24798_c0_seq1	PGSC0003DMP400012540	Epidermis-specific secreted glycoprotein EP1
0	0	0	0	0	0	0	0	0	0	DUL|comp24855_c0_seq1;M1A6U3;DES|comp22186_c0_seq1	DUL|comp24855_c0_seq1;M1A6U3;DES|comp22186_c0_seq1	PGSC0003DMP400011041	Leucine-rich repeat family protein
0	0	0	0	0	0	0	0	0	0	DUL|comp25055_c0_seq1	DUL|comp25055_c0_seq1	PGSC0003DMP400060436	Subtilisin-like protease
0	0	0	0	0	0	0	0	0	0	DUL|comp25080_c0_seq1	DUL|comp25080_c0_seq1
2	1	0	0	0	0	0	0	0	0	DUL|comp25282_c0_seq1	DUL|comp25282_c0_seq1	PGSC0003DMP400050057	Subtilase family protein
1	1	1	0	1	0	0	0	1	0	DUL|comp25356_c0_seq1	DUL|comp25356_c0_seq1	PGSC0003DMP400051976	Glucan endo-1,3-beta-D-glucosidase
0	0	2	0	0	0	0	0	0	0	DUL|comp25497_c0_seq1	DUL|comp25497_c0_seq1	PGSC0003DMP400009956	Beta-mannosidase
0	0	0	0	1	2	0	0	0	0	DUL|comp25556_c0_seq1	DUL|comp25556_c0_seq1	PGSC0003DMP400054112	Carboxypeptidase
0	0	0	0	0	0	0	2	2	0	DUL|comp25693_c0_seq1	DUL|comp25693_c0_seq1	PGSC0003DMP400026614	Esterase
0	0	0	0	0	0	0	0	0	0	DUL|comp25725_c0_seq1	DUL|comp25725_c0_seq1	PGSC0003DMP400037294	SBT1 protein
0	0	0	0	0	0	0	0	0	0	DUL|comp25804_c0_seq1	DUL|comp25804_c0_seq1	PGSC0003DMP400021164	Non-specific lipid-transfer protein
0	0	0	0	0	0	0	0	0	0	DUL|comp25826_c0_seq1	DUL|comp25826_c0_seq1	PGSC0003DMP400044870	Serine-threonine protein kinase, plant-type
0	0	0	0	0	0	0	0	0	0	DUL|comp25922_c0_seq1;M1A6Q8;DES|comp91860_c0_seq2	DUL|comp25922_c0_seq1;M1A6Q8	PGSC0003DMP400010997	Cucumisin
0	0	0	0	0	0	0	0	0	0	DUL|comp26285_c0_seq1	DUL|comp26285_c0_seq1	PGSC0003DMP400027006	Subtilisin-like protease preproenzyme
0	0	0	0	0	0	0	0	0	0	DUL|comp26337_c0_seq1	DUL|comp26337_c0_seq1
3	2	0	1	4	2	1	2	3	0	P30170;P93587;P93584;P81229;P81228;DUL|comp8153_c0_seq1;DUL|comp26884_c0_seq1;M1CZ41;M1C6S0;M1C5F5;M0ZI08;P93585;P30167;P30171;P30168;M1CNK2;M1BNQ4;M1BKU2;M1AHM5;M0ZXL7;DUL|comp23776_c0_seq1;DES|comp90521_c1_seq9;M1CWV6;M1CWV5;M1CZ42;P93586;P30172;P30169;P30173;DUL|comp14660_c0_seq1	P30170;P93587;P93584;P81229;P81228;DUL|comp8153_c0_seq1;DUL|comp26884_c0_seq1;M1CZ41;M1C6S0;M1C5F5;M0ZI08;P93585;P30167;P30171;P30168;M1CNK2;M1BNQ4;M1BKU2;M1AHM5;M0ZXL7;DUL|comp23776_c0_seq1;DES|comp90521_c1_seq9;M1CWV6;M1CWV5;M1CZ42;P93586;P30172;P30169;P30173	PGSC0003DMP400040523	Actin-85C (Fragment)
0	0	0	0	0	0	0	0	0	0	DUL|comp27062_c0_seq1	DUL|comp27062_c0_seq1	PGSC0003DMP400021809	Polygalacturonase
0	0	0	0	0	0	0	0	0	0	DUL|comp27091_c0_seq1	DUL|comp27091_c0_seq1	PGSC0003DMP400054332	Zinc finger protein
1	0	1	1	1	1	1	6	8	4	DUL|comp27912_c0_seq1	DUL|comp27912_c0_seq1	PGSC0003DMP400005002	Zinc finger protein
0	0	0	0	0	0	0	0	0	0	DUL|comp28047_c0_seq1	DUL|comp28047_c0_seq1
0	0	0	0	0	0	0	0	0	0	DUL|comp28202_c0_seq1	DUL|comp28202_c0_seq1	PGSC0003DMP400012644	Serine carboxypeptidase III
0	0	0	0	0	0	0	0	0	0	DUL|comp29179_c0_seq1;M1BLI7	DUL|comp29179_c0_seq1;M1BLI7	PGSC0003DMP400032398	Alpha-L-fucosidase 2
0	1	0	0	0	0	0	0	0	0	DUL|comp29553_c0_seq1;M0ZL30	DUL|comp29553_c0_seq1	PGSC0003DMP400033415	Beta-glucosidase 41
0	0	0	0	0	0	0	0	0	0	DUL|comp30076_c0_seq1	DUL|comp30076_c0_seq1	PGSC0003DMP400038422	Polygalacturonase inhibitor protein
0	0	0	0	0	0	0	0	0	0	DUL|comp30683_c0_seq1	DUL|comp30683_c0_seq1
0	0	0	0	0	0	0	0	0	0	DUL|comp30798_c0_seq1	DUL|comp30798_c0_seq1	PGSC0003DMP400043485	Class IV chitinase
0	0	0	0	0	0	0	0	0	0	DUL|comp31351_c0_seq1	DUL|comp31351_c0_seq1	PGSC0003DMP400017566	Subtilisin-type protease
0	1	0	0	0	0	0	0	0	0	DUL|comp34223_c0_seq1	DUL|comp34223_c0_seq1	PGSC0003DMP400039773	Auxin-induced beta-glucosidase
0	0	0	0	0	0	0	0	0	0	DUL|comp36476_c0_seq1	DUL|comp36476_c0_seq1
0	0	0	0	0	0	0	0	0	0	DUL|comp50383_c0_seq1	DUL|comp50383_c0_seq1
0	0	0	0	0	0	0	0	0	0	DUL|comp51738_c0_seq1	DUL|comp51738_c0_seq1	PGSC0003DMP400039774	Auxin-induced beta-glucosidase
0	0	0	0	0	0	0	0	0	0	DUL|comp52643_c0_seq1	DUL|comp52643_c0_seq1
0	0	0	0	0	0	0	0	0	0	DUL|comp6371_c0_seq1;M1CDE0;DES|comp88406_c0_seq1	DUL|comp6371_c0_seq1;M1CDE0;DES|comp88406_c0_seq1	PGSC0003DMP400043893	Alpha-galactosidase
0	0	0	0	0	0	0	0	0	0	DUL|comp63827_c0_seq1	DUL|comp63827_c0_seq1	PGSC0003DMP400034678	Pectinacetylesterase
0	0	0	0	0	0	0	0	0	0	DUL|comp6822_c0_seq1;M1CMG3;M1CMG2;DES|comp72360_c0_seq1;M1CMG5;M1CMG4	DUL|comp6822_c0_seq1
3	3	0	2	0	1	4	6	9	2	DUL|comp6912_c0_seq1	DUL|comp6912_c0_seq1	PGSC0003DMP400041742	PAE
0	0	0	0	0	0	0	0	0	0	DUL|comp7077_c0_seq1;DES|comp72643_c1_seq1;M0ZHY5;M0ZHY6	DUL|comp7077_c0_seq1;DES|comp72643_c1_seq1;M0ZHY5;M0ZHY6	PGSC0003DMP400000830	Carboxypeptidase
0	0	0	0	0	0	0	0	0	0	DUL|comp7127_c0_seq1;M1B8S4;M1ANW1;DES|comp82651_c0_seq2;M1ANW2;M1ANW0;DUL|comp22050_c0_seq1	DUL|comp7127_c0_seq1;M1B8S4	PGSC0003DMP400026964	Malate dehydrogenase
0	0	0	0	0	0	0	0	0	0	DUL|comp7253_c0_seq1	DUL|comp7253_c0_seq1
0	0	0	0	0	0	0	0	0	0	DUL|comp7773_c0_seq1	DUL|comp7773_c0_seq1	PGSC0003DMP400046980	Kunitz trypsin inhibitor
0	0	0	0	0	0	0	0	0	0	DUL|comp7836_c0_seq1	DUL|comp7836_c0_seq1	PGSC0003DMP400032897	Aspartic proteinase nepenthesin-1
0	0	0	0	0	1	0	0	0	0	M0ZG16;M0ZG14	M0ZG16;M0ZG14	PGSC0003DMP400000048	Beta-hydroxyisobutyryl-CoA hydrolase 1
0	0	0	0	0	0	0	1	4	1	M0ZGZ7;DES|comp93409_c0_seq2;DUL|comp16843_c0_seq1	M0ZGZ7;DES|comp93409_c0_seq2;DUL|comp16843_c0_seq1	PGSC0003DMP400000446	Lanatoside 15'-O-acetylesterase
0	2	2	1	3	2	2	1	2	0	M0ZI24;M0ZI23;M0ZI25;M1BV24	M0ZI24;M0ZI23	PGSC0003DMP400000883	Carboxypeptidase
0	1	0	0	0	0	0	0	1	2	M0ZKC7;DES|comp83716_c0_seq1	M0ZKC7;DES|comp83716_c0_seq1	PGSC0003DMP400001891	Zinc finger protein
0	0	0	0	0	0	0	0	0	0	M0ZMG3;DUL|comp12627_c1_seq1	M0ZMG3;DUL|comp12627_c1_seq1	PGSC0003DMP400002758	Acidic 27 kDa endochitinase
1	1	1	0	0	1	1	1	1	0	M0ZQP9;M0ZQQ0	M0ZQP9;M0ZQQ0	PGSC0003DMP400004182	Glucan endo-1,3-beta-glucosidase
3	2	3	1	0	3	3	4	6	5	M0ZSN3	M0ZSN3	PGSC0003DMP400005002	Zinc finger protein
2	0	0	0	0	0	0	0	0	0	M0ZX98;DES|comp76835_c0_seq3	M0ZX98	PGSC0003DMP400006964	P69F
1	1	0	0	0	0	0	1	1	0	M0ZXA0	M0ZXA0	PGSC0003DMP400006966	Serine protease
2	1	1	1	0	0	0	0	0	0	M0ZXE1	M0ZXE1	PGSC0003DMP400007007	P69B protein
3	1	1	1	1	1	0	1	1	0	M0ZXE2	M0ZXE2	PGSC0003DMP400007008	P69E protein
9	2	4	3	3	3	2	3	3	1	M0ZXE4;M0ZXA1;M0ZX99;M1AXR0;M1AXK0	M0ZXE4	PGSC0003DMP400007010	Serine protease
0	0	0	0	0	0	0	1	1	0	M1A2R4	M1A2R4	PGSC0003DMP400009268	Zinc finger protein
0	0	0	0	0	0	0	0	0	0	M1A5N3	M1A5N3	PGSC0003DMP400010541	Beta-D-glucan exohydrolase
1	0	0	0	0	0	0	0	0	0	M1A5N4	M1A5N4	PGSC0003DMP400010542	Beta-D-glucan exohydrolase
0	0	0	0	0	0	0	0	0	0	M1A5N7;M1A5N6;DES|comp91010_c0_seq1;M1A5N5;M1B088	M1A5N7;M1A5N6;DES|comp91010_c0_seq1	PGSC0003DMP400010545	Hydrolase, hydrolyzing O-glycosyl compounds
2	0	1	1	0	0	1	1	3	3	M1A7U4;DES|comp88293_c0_seq1;M1A7U5	M1A7U4;DES|comp88293_c0_seq1;M1A7U5	PGSC0003DMP400011470	GDSL-like Lipase/Acylhydrolase family protein
2	0	0	0	0	0	2	3	2	0	M1A997;DES|comp89609_c0_seq1;DUL|comp33686_c0_seq1	M1A997;DES|comp89609_c0_seq1;DUL|comp33686_c0_seq1		Uncharacterized protein;;
0	0	0	0	0	0	0	0	0	0	M1AAD9	M1AAD9	PGSC0003DMP400012597	Epidermis-specific secreted glycoprotein EP1
1	1	2	4	3	9	0	1	1	1	M1AAI5;DES|comp82820_c0_seq1	M1AAI5;DES|comp82820_c0_seq1	PGSC0003DMP400012644	Carboxypeptidase
1	0	0	0	0	0	0	0	1	3	M1AB08;M1AB07;DES|comp31045_c0_seq1;DUL|comp10448_c0_seq1;DUL|comp10602_c0_seq1;M1AB06;M1AB09;DUL|comp16295_c0_seq1;M1AB10	M1AB08;M1AB07;DES|comp31045_c0_seq1	PGSC0003DMP400012851	GDSL-lipase 1
1	0	0	0	0	0	0	0	0	0	M1ADP0;DES|comp68993_c0_seq1;DES|comp58524_c0_seq2;DES|comp87621_c0_seq3;M1ADN9	M1ADP0	PGSC0003DMP400013997	Subtilisin-like protease preproenzyme
17	29	32	56	29	20	10	22	21	9	M1AG32;DES|comp91744_c0_seq2	M1AG32;DES|comp91744_c0_seq2	PGSC0003DMP400015021	Cellulase containing protein
2	2	2	1	3	4	1	3	2	0	M1AH25;DES|comp91214_c0_seq1	M1AH25	PGSC0003DMP400015454	Basic 30 kDa endochitinase
1	0	0	0	0	0	0	0	0	0	M1AJ27;M1AJ25	M1AJ27;M1AJ25	PGSC0003DMP400016282	Beta-galactosidase
2	0	0	0	0	0	0	0	0	0	M1AKA9;DES|comp61032_c0_seq1;DUL|comp33056_c0_seq1	M1AKA9	PGSC0003DMP400016780	Periplasmic beta-glucosidase
5	11	5	1	1	0	3	1	1	0	M1AM09	M1AM09	PGSC0003DMP400017566	Subtilisin-type protease
0	0	0	0	0	0	0	0	0	0	M1ANK7	M1ANK7	PGSC0003DMP400018214	RabGAP/TBC domain-containing protein
24	10	7	6	4	4	4	4	4	5	M1AP96;M1AP97;DES|comp85619_c0_seq1;DES|comp77215_c0_seq1;DUL|comp21534_c0_seq1;M1A987;M1A983;DES|comp93998_c0_seq2	M1AP96;M1AP97	PGSC0003DMP400018521	Subtilase
2	4	2	3	3	4	2	4	3	3	M1APC8;M1APC7;DES|comp94832_c0_seq3;M0ZQQ6;M1APC4;M1APB4;M1APB3	M1APC8;M1APC7;DES|comp94832_c0_seq3	PGSC0003DMP400018566	Acidic class II 1,3-beta-glucanase
0	0	3	1	0	1	0	0	0	0	M1AWV7;M1AWV6;DES|comp68893_c0_seq2	M1AWV7;M1AWV6;DES|comp68893_c0_seq2	PGSC0003DMP400021809	Polygalacturonase
0	1	0	0	0	1	0	0	1	0	M1CI29;M1CI30;M1AYE4;P26577;P26576;P26575;P32764;P10647;M1C8J9;DUL|comp24071_c0_seq1	M1CI29;M1CI30;M1AYE4;P26577;P26576;P26575;P32764;P10647;M1C8J9;DUL|comp24071_c0_seq1	PGSC0003DMP400022438	Ribulose bisphosphate carboxylase small chain
4	1	1	0	0	0	0	2	2	4	M1B1I3;DUL|comp35387_c0_seq1	M1B1I3	PGSC0003DMP400023756	GDSL-lipase protein
0	0	0	0	0	2	4	6	0	0	M1B1I5	M1B1I5	PGSC0003DMP400023758	Zinc finger protein
0	0	0	0	0	2	0	0	0	0	M1B3J4;DES|comp63197_c0_seq1	M1B3J4;DES|comp63197_c0_seq1	PGSC0003DMP400024661	Carboxypeptidase
2	1	0	1	1	1	2	1	1	0	M1B4K8;M1B4K7;M1B4K6;M1B4K9	M1B4K8;M1B4K7;M1B4K6;M1B4K9		Carboxypeptidase
0	0	1	0	1	0	0	0	0	0	M1B583;DES|comp91701_c1_seq1;M1B582;DUL|comp26448_c0_seq1;M1CX21;M1C075;DES|comp90672_c0_seq1;M1A6G8;M1ALZ6;DES|comp87394_c0_seq1;DUL|comp21722_c0_seq1	M1B583;DES|comp91701_c1_seq1;M1B582;DUL|comp26448_c0_seq1;M1CX21;M1C075;DES|comp90672_c0_seq1;M1A6G8;M1ALZ6;DES|comp87394_c0_seq1;DUL|comp21722_c0_seq1	PGSC0003DMP400025374	Heat shock cognate protein 80
0	0	0	0	0	0	0	0	1	1	M1B6K1	M1B6K1	PGSC0003DMP400025990	41 kD chloroplast nucleoid DNA binding protein (CND41)
0	0	0	0	0	0	0	0	0	0	M1B703;DES|comp72799_c0_seq1	M1B703;DES|comp72799_c0_seq1	PGSC0003DMP400026173	Peroxidase
22	10	9	4	2	2	0	0	0	0	M1B8V8;DES|comp90649_c0_seq1	M1B8V8;DES|comp90649_c0_seq1	PGSC0003DMP400027005	Subtilisin-like protease preproenzyme
0	0	0	0	0	0	0	0	0	0	M1B8V9	M1B8V9	PGSC0003DMP400027006	Subtilisin-like protease preproenzyme
0	0	0	0	0	1	4	6	1	0	M1BA60;M1BA61;DES|comp83925_c0_seq1;DES|comp81930_c0_seq3;M1BA59	M1BA60;M1BA61;DES|comp83925_c0_seq1	PGSC0003DMP400027551	PAE
0	1	1	1	1	1	1	1	1	1	M1BBG7	M1BBG7	PGSC0003DMP400028116	Subtilisin-like protease
0	0	0	0	0	0	3	2	1	0	M1BFJ1	M1BFJ1	PGSC0003DMP400029877	Patatin
3	2	4	3	2	2	3	10	9	6	M1BJX4;M1BJX3;M1BJX2	M1BJX4;M1BJX3;M1BJX2	PGSC0003DMP400031771	Pectinacetylesterase
1	1	1	0	2	1	0	1	1	2	M1BJX5;DES|comp83915_c0_seq1;DUL|comp25116_c0_seq1	M1BJX5;DES|comp83915_c0_seq1	PGSC0003DMP400031772	Hydrolase
1	1	0	0	0	0	0	0	0	0	M1BNH3	M1BNH3	PGSC0003DMP400033260	Xylem
1	2	2	2	1	2	1	0	0	0	M1BRR7;M1BRR6;M1BRR8;M1BRR9;DES|comp93762_c0_seq7;M1BRR5;M1BRS1;DES|comp93762_c1_seq1;M1BRS0	M1BRR7;M1BRR6;M1BRR8;M1BRR9;DES|comp93762_c0_seq7;M1BRR5	PGSC0003DMP400034675	Pectinacetylesterase
5	6	6	4	6	5	5	8	8	5	M1C8D8;M1C8D9	M1C8D8	PGSC0003DMP400041742	PAE
0	1	0	0	0	0	0	0	0	0	M1C9E5;M1C9E3;M1C9E6;M1C9E4;M1C9E2	M1C9E5;M1C9E3;M1C9E6;M1C9E4;M1C9E2	PGSC0003DMP400042204	Uncharacterized protein
5	8	8	6	10	10	12	17	11	3	M1CAK9;M1CAK8;M1CAK7	M1CAK9	PGSC0003DMP400042675	Heparanase-2
0	0	1	0	0	0	0	0	0	0	M1CFY0;DES|comp89506_c0_seq3;M1CFX6;M1CFX9;M1CFX7	M1CFY0;DES|comp89506_c0_seq3	PGSC0003DMP400044937	Carboxypeptidase
0	0	0	0	1	0	0	0	0	0	M1CGH0	M1CGH0	PGSC0003DMP400045171	Pentatricopeptide repeat-containing protein
0	0	0	1	1	1	1	0	1	1	M1CNC6	M1CNC6	PGSC0003DMP400048151	Carboxypeptidase
0	0	0	0	0	0	0	1	2	4	M1CRE4;DES|comp42290_c0_seq1;M1CRE5;M1CRE6;M1CRE7	M1CRE4;DES|comp42290_c0_seq1;M1CRE5	PGSC0003DMP400049410	Zinc finger protein
0	0	0	0	0	0	4	1	0	0	M1CUR3	M1CUR3	PGSC0003DMP400050915	Patatin group O
2	1	1	1	1	1	0	1	1	0	M1CX91	M1CX91	PGSC0003DMP400051976	Glucan endo-1,3-beta-D-glucosidase
4	12	11	2	0	0	0	0	0	0	M1CXV4;M1CT08;DES|comp75833_c0_seq2;M1CXV3;DES|comp72726_c0_seq2	M1CXV4;M1CT08;DES|comp75833_c0_seq2;M1CXV3	PGSC0003DMP400052225	Conserved gene of unknown function
3	7	9	13	11	7	2	1	0	0	M1D0R2	M1D0R2	PGSC0003DMP400053407	Glycosyl hydrolase family 3 protein
0	0	0	0	0	0	0	3	9	3	M1D2Z6;M1D2Z5;DES|comp90438_c0_seq2	M1D2Z6;M1D2Z5;DES|comp90438_c0_seq2	PGSC0003DMP400054332	Zinc finger protein
3	4	3	2	3	5	7	13	11	4	M1D3Q6;M1D3Q4;M1D3Q5	M1D3Q6;M1D3Q4;M1D3Q5	PGSC0003DMP400054672	Pectin acetylesterase
1	1	0	0	0	0	1	1	0	0	M1D5G4	M1D5G4	PGSC0003DMP400055404	Peroxidase
0	0	0	0	0	0	0	0	0	0	M1D6Y0	M1D6Y0	PGSC0003DMP400055984	Subtilase
11	7	7	5	4	7	2	5	4	2	M1D905	M1D905	PGSC0003DMP400056894	P69B protein
0	0	0	0	0	0	0	0	0	0	M1DGN4;M1A979;M1A980;DUL|comp25259_c0_seq1;DUL|comp53600_c0_seq1;M1A982	M1DGN4;M1A979	PGSC0003DMP400060436	Subtilisin-like protease
1	0	2	0	1	2	2	1	1	1	M1DJL8	M1DJL8	PGSC0003DMP400061765	Uncharacterized protein
0	0	0	0	0	1	0	0	1	0	M1DLF8	M1DLF8	PGSC0003DMP400062574	Repressor protein
0	0	0	0	0	0	0	0	0	0	M1DQR3;M1A985;DES|comp87918_c0_seq1	M1DQR3	PGSC0003DMP400064549	Subtilisin-like protease
18	13	10	8	7	8	6	12	11	9	M1DUG5	M1DUG5	PGSC0003DMP400066275	P69E protein
1	0	0	0	0	0	0	0	0	0	M1DWT5	M1DWT5	PGSC0003DMP400067339	P69E protein
7	9	6	6	6	5	3	5	4	4	P25079	P25079	PGSC0003DMP400055787	Ribulose bisphosphate carboxylase large chain
