# Supplementary material for: Leaf Apoplast of Field-Grown Potato Analyzed by Quantitative Proteomics and Activity-Based Protein Profiling
Source: Int J Mol Sci. 2021 Nov 6;22(21):12033. doi: 10.3390/ijms222112033 (PMC8584485; doi:10.3390/ijms222112033)
Supplement: Supplementary file 1 [file ijms-22-12033-s001.zip › Supplementary Table S2.xlsx]

## Sheet: Sheet2
Peptide Sequence	External IDs	Protein Name	Log2 fold change
ANFSTPPGKR	PGSC0003DMP400019038	Hypothetical gene of unknown function	4.14195
LFMYIQGK	PGSC0003DMP400048033	Heme-binding protein	4.00351
GPSKPNPGILKPDIIGPGVNILAAWPTSVDDNKDTK	Q9LWA4	Subtilisin-like protease	3.94899
SDVPIITPQELAEADGFVFGFPTR	PGSC0003DMP400011066	Quinone reductase family protein	3.89381
CNNGWWFISCNYDPVGNWVGQRPY	PGSC0003DMP400041357	Cytoplasmic small heat shock protein class I	3.89028
AAWDVVEETSAAASHAR	PGSC0003DMP400012908	CP12	3.88092
TNEFCCTNGPGSCSPTDFSR	Q5XUG9	Putative thaumatin-like protein (Solanum tuberosum)	3.82053
SAPIIAAFSSR	M1D905	Uncharacterized protein (Solanum tuberosum)	3.81193
VGPDDPQITEAIAR	PGSC0003DMP400052472	Ectonucleotide pyrophosphatase/phosphodiesterase	3.75604
NLQQGMGLFTSDQVLYTDKR	PGSC0003DMP400043335	peroxidase	3.58447
VHPKMMILFSLYAMAR	PGSC0003DMP400054361	Cytochrome P450	3.55446
VTPTRDGAPVENSPR	PGSC0003DMP400066823	Hypothetical gene of unknown function	3.53351
CTYPVWAAASPGGGR	PGSC0003DMP400007584	thaumatin	3.52674
IVAISLDDPR	PGSC0003DMP400005581	Inorganic pyrophosphatase	3.52257
LPGFGVITNIINGGLECGR	PGSC0003DMP400046624	Endochitinase 2	3.49859
VSTATYSGLLTNTYPPSASIFREEYK	Q70BW9	1,3-beta-glucan glucanohydrolase	3.48868
CNNGWWFISCNYDPVGNYVGQRPY	Q8L688	Pathogenesis related protein isoform b1	3.48659
FSEITGAGGR	PGSC0003DMP400022826	MRNA binding protein	3.44888
QPATSGSIVTLHGR	PGSC0003DMP400030235	DNA binding protein	3.43092
MGNISPLTGTDGEIR	Q9SD46	Peroxidase 36	3.42068
KPGSTIETYLFAMFDENQK	PGSC0003DMP400018563	Glucan endo-1,3-beta-glucosidase A	3.40974
LDTNGLGYQR	P32045	Pathogenesis-related protein P2	3.40639
GFGLEGFR	PGSC0003DMP400024548	Protein phosphatase 2c	3.38006
DVVESVDLEKK	PGSC0003DMP400013223	Sn-2 protein	3.33094
AVDPQLETVNK	PGSC0003DMP400004564	D-glycerate 3-kinase, chloroplast	3.32594
TADGDEGGKHQLITATVNDGK	PGSC0003DMP400001760	Oxygen-evolving enhancer protein 2, chloroplastic	3.3169
DVGILITK	PGSC0003DMP400046980	Kunitz trypsin inhibitor	3.29445
FYLQPLTPAEAVQR	PGSC0003DMP400037659	Photosystem II oxygen-evolving complex protein 3	3.28791
IINKDNVQEAAR	PGSC0003DMP400054142	Glucose-1-phosphate adenylyltransferase small subunit, chloroplastic/amyloplastic	3.28447
AEDIVAINTESAVR	PGSC0003DMP400021809	Polygalacturonase	3.28397
AVAFHNVNSESGLK	PGSC0003DMP400039008	Ripening regulated protein DDTFR10	3.27871
LNVIHDVGASK	PGSC0003DMP400007118	Citrate binding protein	3.27674
TVTNVGDATSSYKLEVASPK	PGSC0003DMP400007010	P69B protein	3.26615
CLYDVLAHTYSCH	PGSC0003DMP400013560	Hypothetical gene of unknown function	3.26166
TTYLVDIVR	PGSC0003DMP400018078	Alpha galactosidase	3.25335
YEIEAIDR	PGSC0003DMP400023296	Sn-1 protein	3.22028
AWSYTDYGSVDVLK	PGSC0003DMP400053992	Alcohol dehydrogenase	3.21228
VYDAGHMVPMDQPK	PGSC0003DMP400000884	Serine carboxypeptidase III	3.20811
TTYPVAVYQVDK	PGSC0003DMP400010929	Cell adhesion protein	3.20433
IVIGLYGDDVPQTAENFR	PGSC0003DMP400009292	Peptidyl-prolyl cis-trans isomerase CYP20-2, chloroplastic	3.19685
IYVPLALQLLVTCGK	PGSC0003DMP400005194	Extensin	3.16253
LGVCANVLGNLLGVVLGNPPK	Q6EAL9	Arachidonic acid-induced DEA1	3.16213
SSIYGLGEHTK	PGSC0003DMP400028028	Alpha-glucosidase 1	3.15754
HLQADPTLAAALIR	PGSC0003DMP400052953	Anionic peroxidase swpa7	3.14914
VQAGPNYFILPVIR	PGSC0003DMP400046981	Kunitz trypsin inhibitor	3.1351
CVPSGTYGNKHECPCYR	PGSC0003DMP400037307	Snakin-1	3.11671
VLGGCNNPCTIGQCGPNDLSR	Q5XUH0	Osmotin-like protein	3.10704
YEHTGFTGGLNYYR	PGSC0003DMP400020027	Epoxide hydrolase 1	3.08784
SQFYLLDIGSCWK	Q944A3	At2g47010/F14M4.16	3.0753
EDPNQNTGISILSGK	PGSC0003DMP400055021	Pectinesterase	3.05659
TLLSIGGGR	Q43576	Chitinase, class V	3.04354
ANYLPYGIDFPGGPTGR	PGSC0003DMP400012851	Uncharacterized protein (Solanum tuberosum)	3.01809
CLCLLIK	PGSC0003DMP400050496	Non-specific lipid-transfer protein	3.01595
AFLLPITK	PGSC0003DMP400015799	Xyloglucan-specific endoglucanase inhibitor 4	3.01101
AVEDACSGVVSCADILAIAAR	PGSC0003DMP400041612	Peroxidase	3.00702
LIEIEGPR	PGSC0003DMP400050946	60S ribosomal protein L9	-3.26136
AIDNMSEVSVEDKEK	Q8GY46	At5g13560	-3.26576
GCDASILIK	PGSC0003DMP400042015	Haem peroxidase, plant/fungal/bacterial	-3.34198
KISEEEYVK	PGSC0003DMP400048869	Methionine synthase	-3.45191
AGGLQDKEGGIR	PGSC0003DMP400015506	NAD-dependent epimerase/dehydratase	-3.46267
VMDEELGIVK	PGSC0003DMP400017652	Glyceraldehyde-3-phosphate dehydrogenase	-3.7644
LAEVDKYEEDEEEALEK	PGSC0003DMP400020663	Chalcone isomerase	-3.76596
HFGLFTASR	PGSC0003DMP400051976	Glucan endo-1,3-beta-D-glucosidase	-4.10254
