# Supplementary material for: Leaf Apoplast of Field-Grown Potato Analyzed by Quantitative Proteomics and Activity-Based Protein Profiling
Source: Int J Mol Sci. 2021 Nov 6;22(21):12033. doi: 10.3390/ijms222112033 (PMC8584485; doi:10.3390/ijms222112033)
Supplement: Supplementary file 1 [file ijms-22-12033-s001.zip › Supplementary Table S3.xlsx]

## Sheet: Supplementary Table S3.  
Peptide Sequence	Protein IDs	Protein Name	Log2 fold change
HACPATFTYAHDSPSLMHECSSPR	Q41350	Osmotin-like protein	4.10251
NVVDGWTTFR	PGSC0003DMP400031280	Pectinesterase	4.07226
AFQDLDALQYR	PGSC0003DMP400042888	xyloglucan endotransglucosylase/hydrolase 1	3.91889
CNVNSVYQLGDSLADAGNVIR	PGSC0003DMP400011470	GDSL-like Lipase/Acylhydrolase family protein	3.81405
KYPMTEETPVAVKPIGTPR	PGSC0003DMP400051416	High mobility group protein	3.74978
SSTSSLDPVDGEGFMK	PGSC0003DMP400007341	Xyloglucan endotransglycosylase hydrolase	3.7078
DVVESVDLEK	PGSC0003DMP400013223	Sn-2 protein	3.70595
GLQIGPDYTHLTTAAQIQLGQMLADAFLRPN	PGSC0003DMP400031772	Hydrolase	3.68856
DDSPVLSGTTIAK	PGSC0003DMP400041742	PAE	3.54833
QVIDHIDEEK	DES.m.33465	N/A	3.54176
QIIEAIDPHKK	PGSC0003DMP400027837	Sn-1 protein	3.54171
TAVDHLSQFQSDGGSMLYVPAGK	PGSC0003DMP400021809	Polygalacturonase	3.54124
CVTGCGQPTQR	PGSC0003DMP400026688	Beta-galactosidase	3.46928
TPAVYDEDVFK	M1D353	Uncharacterized protein (Solanum tuberosum)	3.44351
VNVPYQISPNVDCLK	PGSC0003DMP400028125	Non-specific lipid-transfer protein	3.436
GPNSITPEILKPDIIAPGVNILAGWTGAVGPTGMAEDDRR	PGSC0003DMP400043338	Subtilisin-like protease	3.42683
HACPATITYAHDSPSLMHECSSPR	PGSC0003DMP400000789	Osmotin	3.41033
DHANYYSPR	PGSC0003DMP400027836	Alpha-glucosidase	3.41027
QGDMLLVVPEGYAAVR	PGSC0003DMP400050666	Unidentified	3.4042
NQVYGLYQCR	PGSC0003DMP400063324	DUF26 domain-containing protein 2	3.38594
FEQIMQETTTNK	PGSC0003DMP400001015	Class III peroxidase	3.38271
IIEGDLLEYYK	PGSC0003DMP400021281	major latex	3.35271
QLVQWPVEELETLR	PGSC0003DMP400049112	Beta-fructofuranosidase	3.32901
VAYIDIYSIILEAVQNPQK	PGSC0003DMP400018956	Zinc finger protein	3.32169
SITMCYSTAQEDLSVSDQMGAISEAK	PGSC0003DMP400018521	Subtilisin-like protease	3.31458
FCQTGLPISVR	PGSC0003DMP400016778	Periplasmic beta-glucosidase	3.28562
DAVVATGGPFWNVPTGR	PGSC0003DMP400044199	Peroxidase	3.27454
CFCEFLR	PGSC0003DMP400037715	non-specific lipid-transfer protein type 2 subfamily	3.22882
FVCEGQSDEPK	PGSC0003DMP400026806	Proteinase inhibitor type-2 CEVI57	3.18714
NQLYGNLGPK	Q76MS4	LEXYL2 protein	3.18393
GYESTLGPIDVSK	PGSC0003DMP400026165	Subtilisin-like protease	3.16062
AINEDLLNNPYLVATDPVISFK	PGSC0003DMP400015454	Endochitinase 2	3.15885
TTFEMLLDR	PGSC0003DMP400014905	Polygalacturonase inhibiting protein	3.14678
LWDGAYSSSER	PGSC0003DMP400028363	Glycosyl hydrolase family 20 protein	3.14111
GEEMGLSSGGSTLWK	PGSC0003DMP400014264	Beta-galactosidase	3.13044
IWIFSGDVDGR	PGSC0003DMP400008162	Grain size 5	3.08605
IIDLVGNK	PGSC0003DMP400002269	Leucine-rich repeat protein	3.04177
LSGANPEVAITIPK	PGSC0003DMP400050379	Xylem sap protein 10 kDa	3.03783
NLLIGTNFASAAAGFDDK	PGSC0003DMP400004464	Zinc finger protein	3.0156
VWIFSGDTDGR	PGSC0003DMP400011982	Serine carboxypeptidase	3.01509
IIGNENSAANYLSK	PGSC0003DMP400023756	GDSL-lipase protein	3.00562
SFNEQNDELK	PGSC0003DMP400051414	Desacetoxyvindoline 4-hydroxylase	-2.97175
APAPAPESAPASEPAPAPVVEGDKEEEK	K7VT51	Uncharacterized protein (Solanum tuberosum)	-3.0622
QVFDVLLR	SM.m.38451	N/A	-3.15144
VWQNEAVLRACGESDAPNPPGASNTK	Q94F28	Putative uncharacterized protein At1g27435/F17L21.30	-3.47175
YGKLDETQGIGQYVEK	PGSC0003DMP400049374	drought-induced protein SDi-6-like	-3.48802
SSLEHVLR	F4IUX6	Regulator of nonsense transcripts UPF2	-3.52526
EMANAFSELTDPLDQR	PGSC0003DMP400055355	Lysyl-tRNA synthetase	-3.7859
